# Supplementary material
Source: Research Square preprint supplement (doi:10.21203/rs.3.rs-10151581/v1)
Supplement: Supplementary file 1 [file 772b1c5063dbfb370f894041.docx]

| **Table 1** Mean (M), standard deviation (SD), Cronbach alpha (α), composite reliability (CR), average variance explained (AVE), Pearson correlation coefficients of the examined variables.  Table 1: Mean, standard deviation (SD), Cronbach alpha (α), composite reliability (CR), average variance explained (AVE), Pearson correlation coefficients of the examined variables | | | | | | | | | | | | | | |
| --- | --- | --- | --- | --- | --- | --- | --- | --- | --- | --- | --- | --- | --- | --- |
| *Variable* | *M* | *SD* | *α* | *CR* | *AVE* | *1* | *2* | *3* | *4* | *5* | *6* | *7* | *8* | *9* |
| 1. Climate anxiety | 2.895 | 1.055 | .852 | .858 | .607 |  |  |  |  |  |  |  |  |  |
| 2. Climate anger | 3.273 | 1.027 | .864 | .865 | .618 | .633*** |  |  |  |  |  |  |  |  |
| 3. Climate sorrow | 3.306 | 1.168 | .913 | .914 | .726 | .766*** | .690*** |  |  |  |  |  |  |  |
| 4. Climate guilt | 2.296 | 0.934 | .860 | .866 | .622 | .553*** | .478*** | .475*** |  |  |  |  |  |  |
| 5. Climate hope | 2.981 | 0.905 | .825 | .827 | .546 | .536*** | .603*** | .587*** | .483*** |  |  |  |  |  |
| 6. Private PEB | 4.924 | 1.109 | .840 | .818 | .397 | .441*** | .410*** | .494*** | .228*** | .403*** |  |  |  |  |
| 7. Activist PEB | 2.117 | 1.116 | .863 | .874 | .486 | .374*** | .380*** | .399*** | .373*** | .346*** | .340*** |  |  |  |
| 8. Emotional well-being | 3.911 | 1.367 | .896 | .897 | .745 | -.160*** | -.100* | -.119** | -.073 | .052 | .097* | -.024 |  |  |
| 9. Social well-being | 2.988 | 1.157 | .817 | .818 | .474 | .041 | .070 | .059 | .129** | .259*** | .265*** | .133** | .652*** |  |
| 10. Psychological well-being | 3.688 | 1.222 | .889 | .891 | .581 | -.052 | -.017 | -.021 | -.011 | .111* | .202*** | .080 | .754*** | .696*** |
