# Supplementary material
Source: Research Square preprint supplement (doi:10.21203/rs.3.rs-10151581/v1)
Supplement: Supplementary file 2 [file 9c70de13b55a2f618744fc8f.docx]

| **Table 3** Standardized effects of PEB on well‑being dimensions in the full and restricted models, and differences in effects between models. | | | |
| --- | --- | --- | --- |
| *Path* | *β - full model* | *β - restricted model* | *Δ β* |
| Private PEB → Emotional Well-being | .180** [.071, .290] | .102* [.002, .202] | .078** [.018, .137] |
| Activist PEB → Emotional Well-being | .001 [-.095, .096] | -.052 [-.145, .040] | .053* [.003, .099] |
| Private PEB → Social Well-being | .249*** [.147, .351] | .228*** [.132, .325] | .020 [-.040, .075] |
| Activist PEB → Social Well-being | .049 [-.039, .138] | .063 [-.023, .150] | -.014 [-.066, .031] |
| Private PEB → Psychological Well-being | .232*** [.122, .342] | .180*** [.081, .280] | .052 [-.008, .109] |
| Activist PEB → Psychological Well-being | .062 [-.032, .157] | .028 [-.062, .119] | .034 [-.012, .080] |
| Note: Confidence intervals are presented in parentheses; * p < .05, ** p < .01, *** p < .001. | | | |
