# Supplementary material
Source: Research Square preprint supplement (doi:10.21203/rs.3.rs-10151581/v1)
Supplement: Supplementary file 3 [file cc248b5c068819e95f4133c5.docx]

| **Table 2** Standardized direct, indirect, and total effects of the hypothesized path model. | | | | | | | |
| --- | --- | --- | --- | --- | --- | --- | --- |
| *Hypothesis* | *Effect type* | *Path* | *Outcome variable* | | | | |
|  |  |  | *Emotional WB* | *Social WB* | *Psychological WB* | *Private PEB* | *Activist PEB* |
| H1a-c | Direct effects | Private PEB → | **.180** [.071, .290]** | **.249*** [.147, .351]** | **.232*** [.122, .342]** |  |  |
| H1d-f | Activist PEB → | .001 [-.095, .096] | .049 [-.039, .138] | .062 [-.032, .157] |  |  |
| H3a, H2a | Climate anxiety → | **-.214** [-.359, -.069]** | **-.143* [-.266, -.019]** | **-.151* [-.287, -.015]** | **.139* [.012, .265]** | .035 [-.096, .166] |
| H3b, H2b | Climate anger → | -.093 [-.224, .039] | -.103 [-.223, .016] | -.087 [-.219, .045] | .078 [-.050, .206] | .102 [-.020, .225] |
| H3c, H2c | Climate sorrow → | -.100 [-.252, .052] | -.120 [-.257, .017] | -.076 [-.226, .074] | **.283*** [.149, .417]** | **.185* [.044, .326]** |
| H3d, H2d | Climate guilt → | .004 [-.114, .122] | **.108* [.002, .214]** | .006 [-.102, .114] | -.078 [-.183, .026] | **.187** [.075, .298]** |
| H3e, H2e | Climate hope → | **.210*** [.095, .326]** | **.310*** [.209, .412]** | **.188** [.072, .305]** | **.155** [.045, .264]** | .083 [-.026, .192] |
| H3a | Indirect effects | Climate anxiety → Private PEB → | .025 [-.004, .054] | .034 [-.001, .070] | .032 [-.002, .066] |  |  |
| H3b | Climate anger → Private PEB → | .014 [-.009, .037] | .019 [-.012, .051] | .018 [-.011, .047] |  |  |
| H3c | Climate sorrow → Private PEB → | **.051* [.010, .092]** | **.070** [.024, .117]** | **.066** [.018, .113]** |  |  |
| H3d | Climate guilt → Private PEB → | -.014 [-.033, .005] | -.019 [-.047, .008] | -.018 [-.043, .007] |  |  |
| H3e | Climate hope → Private PEB → | **.028* [.003, .053]** | **.038* [.007, .070]** | **.036* [.006, .066]** |  |  |
| H3a | Climate anxiety → Activist PEB → | .000 [-.003, .003] | .002 [-.005, .009] | .002 [-.007, .011] |  |  |
| H3b | Climate anger → Activist PEB → | .000 [-.010, .010] | .005 [-.006, .016] | .006 [-.007, .020] |  |  |
| H3c | Climate sorrow → Activist PEB → | .000 [-.018, .018] | .009 [-.009, .027] | .012 [-.008, .031] |  |  |
| H3d | Climate guilt → Activist PEB → | .000 [-.018, .018] | .009 [-.009, .027] | .012 [-.008, .031] |  |  |
| H3e | Climate hope → Activist PEB → | .000 [-.008, .008] | .004 [-.006, .014] | .005 [-.006, .016] |  |  |
|  | Total effects | Climate anxiety → | **-.189* [-.341, -.037]** | -.107 [-.235, .022] | -.117 [-.262, .028] |  |  |
|  | Climate anger → | -.078 [-.214, .058] | -.079 [-.207, .049] | -.062 [-.200, .075] |  |  |
|  | Climate sorrow → | -.049 [-.204, .106] | -.040 [-.182, .101] | .001 [-.155, .156] |  |  |
|  | Climate guilt → | -.010 [-.128, .107] | .098 [-.011, .207] | -.001 [-.111, .110] |  |  |
|  | Climate hope → | **.238*** [.124, .352]** | **.353*** [.249, .456]** | **.229*** [.111, .348]** |  |  |
|  | *R2* |  | .09 | .17 | .11 | .31 | .23 |
| Note. Confidence intervals are presented in parentheses; significant effects (p < .05) are bolded; * p < .05, ** p < .01, *** p < .001. | | | | | | | |
