# Supplementary material
Source: Research Square preprint supplement (doi:10.21203/rs.3.rs-10151581/v1)
Supplement: Supplementary file 4 [file e27622b544518ef25a87f4a6.docx]

# 1. Sociodemographic characteristics of the sample

**Supplementary table 1:** *Gender, age categories, educational level, municipality size, and administrative region of the final sample*

| *Variable* | *Category* | *Frequency* | *Relative frequency* |
| --- | --- | --- | --- |
| Gender | Male | 242 | 48.4% |
|  | Female | 258 | 51.6% |
| Age category | 18-29 | 75 | 15.0% |
|  | 30-39 | 81 | 16.2% |
|  | 40-49 | 101 | 20.2% |
|  | 50-59 | 83 | 16.6% |
|  | 60 and more | 160 | 32.0% |
| Education | Lower secondary education | 34 | 6.8% |
|  | Upper secondary vocational education (apprenticeship) | 188 | 37.6% |
|  | Upper secondary education with school‑leaving exam (Maturita) | 181 | 36.2% |
|  | Bachelor’s, master’s, doctoral degree | 97 | 19.4% |
| Municipality size | less than 5 000 inhabitants | 196 | 39.2% |
|  | 5 000 to 19 999 inhabitants | 89 | 17.8% |
|  | 20 000 až 99 9999 inhabitants | 108 | 21.6% |
|  | 100 000 - 999 999 inhabitants | 107 | 21.4% |
|  | Prague (~ more than 1 000 000 inhabitants) | 62 | 12.4% |
| Administrative region | Central Bohemian Region | 67 | 13.4% |
|  | South Bohemian Region | 28 | 5.6% |
|  | South Moravian Region | 57 | 11.4% |
|  | Karlovy Vary Region | 15 | 3.0% |
|  | Vysočina Region | 21 | 4.2% |
|  | Liberec Region | 22 | 4.4% |
|  | Hradec Králové Region | 21 | 4.2% |
|  | Moravian‑Silesian Region | 57 | 11.4% |
|  | Olomouc Region | 31 | 6.2% |
|  | Pardubice Region | 25 | 5.0% |
|  | Plzeň Region | 29 | 5.8% |
|  | Ústí nad Labem Region | 37 | 7.4% |
|  | Zlín Region | 28 | 5.6% |

The sample’s sociodemographic characteristics corresponded to those observed in the general population (Czech Statistical Office, n.d.).

# 2. Scales inspection

## Climate emotions

**Supplementary table 2** *Global fit indices of the climate emotions measure in the pilot and final sample*

| *Fit index* | *Pilot sample* | *Study sample* |
| --- | --- | --- |
| χ² | 373.461 | 371.481 |
| df | 160 | 160 |
| p-value | 0.000 | 0.000 |
| CFI | 0.970 | 0.954 |
| TLI | 0.965 | 0.945 |
| SRMR | 0.032 | 0.042 |
| RMSEA | 0.041 | 0.051 |
| RMSEA - 90 % CI lower bound | 0.037 | 0.045 |
| RMSEA - 90 % CI upper bound | 0.045 | 0.057 |
| RMSEA p-value | 1.000 | 0.341 |
| AIC | 31423.178 | 25955.599 |
| BIC | 31656.334 | 26166.330 |

**Note:** Pilot sample was a a convenience sample (n = 802) recruited via social media (Reddit, Facebook).

**Supplementary table 3** *Factor loadings of the climate emotions items in the pilot and final sample*

| *Item* | *λ - pilot sample* | *λ - study sample* |
| --- | --- | --- |
| ANXIETY_1 | 0.889 | 0.87 |
| ANXIETY_2 | 0.81 | 0.654 |
| ANXIETY_3 | 0.861 | 0.722 |
| ANXIETY_4 | 0.832 | 0.829 |
| ANGER_1 | 0.863 | 0.772 |
| ANGER_2 | 0.918 | 0.74 |
| ANGER_3 | 0.816 | 0.772 |
| ANGER_4 | 0.924 | 0.854 |
| SORROW_1 | 0.865 | 0.872 |
| SORROW_2 | 0.919 | 0.834 |
| SORROW_3 | 0.901 | 0.82 |
| SORROW_4 | 0.899 | 0.881 |
| GUILT_1 | 0.914 | 0.851 |
| GUILT_2 | 0.919 | 0.661 |
| GUILT_3 | 0.925 | 0.757 |
| GUILT_4 | 0.933 | 0.844 |
| HOPE_1 | 0.761 | 0.74 |
| HOPE_2 | 0.72 | 0.671 |
| HOPE_3 | 0.77 | 0.717 |
| HOPE_4 | 0.883 | 0.818 |

## Pro-environmental behaviour

Before the study, we piloted the PEB measure on pilot convenience sample (n = 108) recruited via social media (Reddit, Facebook). To enhance cultural relevance, we included further items from Schmitt et al. (2019) besides the original 16 items (Stanley et al., 2021). Item 5 of the original private PEB subscale (“Switching lights off around the house”) loaded poorly. Given that this behaviour is potentially habitual rather than intentional, and highly common, as reflected in substantial skewness, we replaced it with an alternative item (“Using reusable containers rather than disposable ones”) from Schmitt et al. (2019), which demonstrated the strongest loading in our pretesting. The fit indices and factor loadings of the original and adjusted scales for pilot and study samples are presented in Supplementary tables 4 and 5.

**Supplementary table 4** *Global fit indices of the PEB measure in the pilot and final sample*

| *Fit index* | *Pilot sample - original scale* | *Pilot sample - adjusted final scale* | *Study sample - original scale* | *Study sample - adjusted final scale* |
| --- | --- | --- | --- | --- |
| χ² | 159.777 | 154.044 | 353.717 | 232.808 |
| df | 100 | 100 | 100 | 100 |
| p-value | 0.000 | 0.000 | 0.000 | 0.000 |
| CFI | 0.920 | 0.931 | 0.897 | 0.947 |
| TLI | 0.904 | 0.917 | 0.876 | 0.936 |
| SRMR | 0.073 | 0.070 | 0.079 | 0.057 |
| RMSEA | 0.074 | 0.071 | 0.071 | 0.052 |
| RMSEA - 90 % CI lower bound | 0.052 | 0.048 | 0.064 | 0.043 |
| RMSEA - 90 % CI upper bound | 0.095 | 0.092 | 0.079 | 0.060 |
| RMSEA p-value | 0.035 | 0.063 | 0.000 | 0.367 |
| AIC | 6307.300 | 6303.776 | 26726.036 | 26864.250 |
| BIC | 6403.856 | 6400.332 | 26877.762 | 27015.976 |

**Supplementary table 5** *Factor loadings of the PEB items in the pilot and final sample*

| *Item* | *λ - pilot sample - original scale* | *λ - study sample -original scale* | *λ - pilot sample - adjusted scale* | *λ - study sample -adjusted scale* |
| --- | --- | --- | --- | --- |
| PEB_01_priv | 0.745 | 0.721 | 0.808 | 0.801 |
| PEB_02_priv | 0.499 | 0.566 | 0.542 | 0.667 |
| PEB_03_priv | 0.746 | 0.618 | 0.703 | 0.555 |
| PEB_04_priv | 0.711 | 0.701 | 0.684 | 0.639 |
| PEB_05_priv | 0.439 | 0.491 | - | - |
| PEB_NEW_2_priv | - | - | 0.749 | 0.717 |
| PEB_06_priv | 0.677 | 0.486 | 0.684 | 0.495 |
| PEB_07_priv | 0.72 | 0.557 | 0.681 | 0.505 |
| PEB_08_priv | 0.712 | 0.614 | 0.686 | 0.61 |
| PEB_09_act | 0.532 | 0.511 | 0.528 | 0.51 |
| PEB_10_act | 0.598 | 0.533 | 0.598 | 0.578 |
| PEB_11_act | 0.619 | 0.689 | 0.621 | 0.687 |
| PEB_12_act | 0.708 | 0.742 | 0.71 | 0.753 |
| PEB_13_act | 0.602 | 0.719 | 0.6 | 0.72 |
| PEB_14_act | 0.718 | 0.788 | 0.719 | 0.785 |
| PEB_15_act | 0.827 | 0.598 | 0.829 | 0.596 |
| PEB_16_act | 0.736 | 0.72 | 0.732 | 0.717 |

## Well-being – MHC-SF

We tested five factor solutions in total: four structures proposed by authors of the scale (Żemojtel‐Piotrowska et al., 2018), and an additional two‑factor model combining emotional and psychological well‑being, which was motivated by the observed inter‑item correlations (denoted as ‘2 factors – alternative’ in Supplementary Table 6). The bifactor specification is reported in the table; however, it produced an improper solution with negative residual variances and was therefore not retained.

**Supplementary table 6** *Global fit indices of the well-being measure (MHC-SF) in the pilot and final sample*

| *Fit index* | **3 Factors** | 1 Factor | 2 Factors | Bifactor | 2 Factors - alternative |
| --- | --- | --- | --- | --- | --- |
| χ² | **189.795** | 434.013 | 304.674 | 133.777 | 321.409 |
| df | **74** | 77 | 76 | 63 | 76 |
| p-value | **0.000** | 0.000 | 0.000 | 0.000 | 0.000 |
| CFI | **0.960** | 0.876 | 0.920 | 0.975 | 0.915 |
| TLI | **0.950** | 0.853 | 0.905 | 0.964 | 0.898 |
| SRMR | **0.043** | 0.059 | 0.054 | 0.032 | 0.048 |
| RMSEA | **0.056** | 0.096 | 0.078 | 0.047 | 0.080 |
| RMSEA - 90 % CI lower bound | **0.048** | 0.089 | 0.070 | 0.038 | 0.073 |
| RMSEA - 90 % CI upper bound | **0.064** | 0.104 | 0.085 | 0.057 | 0.088 |
| RMSEA p-value | **0.117** | 0.000 | 0.000 | 0.655 | 0.000 |
| AIC | **21764.020** | 22108.034 | 21924.231 | 21694.410 | 21947.348 |
| BIC | **21894.673** | 22226.043 | 22046.455 | 21871.423 | 22069.572 |

**Supplementary table 7** *Factor loadings of the well-being items in the final sample*

| *Item* | *λ* |
| --- | --- |
| WB_01_emo | 0.873 |
| WB_02_emo | 0.815 |
| WB_03_emo | 0.903 |
| WB_04_soc | 0.626 |
| WB_05_soc | 0.647 |
| WB_06_soc | 0.742 |
| WB_07_soc | 0.733 |
| WB_08_soc | 0.695 |
| WB_09_psych | 0.801 |
| WB_10_psych | 0.785 |
| WB_11_psych | 0.75 |
| WB_12_psych | 0.612 |
| WB_13_psych | 0.77 |
| WB_14_psych | 0.83 |

# 3. Final Model Coefficients

**Supplementary table 8** Complete final model coefficients including control variables

| *Outcome variable* | *Operator* | *Predictor variable* | *Parameter label* | *β* | *SE* | *z‑value* | *p‑value* | *95% CI (lower)* | *95% CI (upper)* |
| --- | --- | --- | --- | --- | --- | --- | --- | --- | --- |
| Private PEB | ~ | Gender |  | .061 | .038 | 1.595 | .111 | -.014 | .136 |
| **Private PEB** | **~** | **Age** |  | **.181** | **.036** | **5.022** | **.000** | **.111** | **.252** |
| **Activist PEB** | **~** | **Gender** |  | **-.098** | **.041** | **-2.380** | **.017** | **-.179** | **-.017** |
| Activist PEB | ~ | Age |  | -.016 | .037 | -0.440 | .660 | -.088 | .056 |
| Emotional well-being | ~ | Gender |  | .007 | .044 | 0.159 | .874 | -.079 | .092 |
| Emotional well-being | ~ | Age |  | .084 | .043 | 1.957 | .050 | .000 | .168 |
| Social well-being | ~ | Gender |  | -.020 | .042 | -0.484 | .628 | -.103 | .062 |
| **Social well-being** | **~** | **Age** |  | **.132** | **.041** | **3.196** | **.001** | **.051** | **.212** |
| Psychological well-being | ~ | Gender |  | -.045 | .044 | -1.021 | .307 | -.132 | .041 |
| **Psychological well-being** | **~** | **Age** |  | **.138** | **.043** | **3.245** | **.001** | **.055** | **.222** |
| **Climate anxiety** | **~** | **Gender** |  | **.163** | **.043** | **3.747** | **.000** | **.078** | **.248** |
| Climate anxiety | ~ | Age |  | -.056 | .042 | -1.326 | .185 | -.139 | .027 |
| **Climate anger** | **~** | **Gender** |  | **.123** | **.044** | **2.798** | **.005** | **.037** | **.210** |
| Climate anger | ~ | Age |  | -.069 | .043 | -1.617 | .106 | -.153 | .015 |
| **Climate sorrow** | **~** | **Gender** |  | **.216** | **.042** | **5.090** | **.000** | **.133** | **.299** |
| Climate sorrow | ~ | Age |  | -.065 | .041 | -1.585 | .113 | -.145 | .015 |
| **Climate guilt** | **~** | **Gender** |  | **.104** | **.044** | **2.345** | **.019** | **.017** | **.191** |
| **Climate guilt** | **~** | **Age** |  | **-.117** | **.044** | **-2.645** | **.008** | **-.203** | **-.030** |
| **Climate hope** | **~** | **Gender** |  | **.169** | **.044** | **3.857** | **.000** | **.083** | **.255** |
| Climate hope | ~ | Age |  | -.046 | .043 | -1.090 | .276 | -.130 | .037 |
| **Emotional well-being** | **~** | **Private PEB** | **b1** | **.180** | **.056** | **3.226** | **.001** | **.071** | **.290** |
| Emotional well-being | ~ | Activist PEB | b2 | .001 | .049 | 0.012 | .990 | -.095 | .096 |
| **Social well-being** | **~** | **Private PEB** | **b3** | **.249** | **.052** | **4.775** | **.000** | **.147** | **.351** |
| Social well-being | ~ | Activist PEB | b4 | .049 | .045 | 1.091 | .275 | -.039 | .138 |
| **Psychological well-being** | **~** | **Private PEB** | **b5** | **.232** | **.056** | **4.149** | **.000** | **.122** | **.342** |
| Psychological well-being | ~ | Activist PEB | b6 | .062 | .048 | 1.300 | .194 | -.032 | .157 |
| **Private PEB** | **~** | **Climate anxiety** | **a1** | **.139** | **.065** | **2.142** | **.032** | **.012** | **.265** |
| Private PEB | ~ | Climate anger | a2 | .078 | .065 | 1.198 | .231 | -.050 | .206 |
| **Private PEB** | **~** | **Climate sorrow** | **a3** | **.283** | **.068** | **4.143** | **.000** | **.149** | **.417** |
| Private PEB | ~ | Climate guilt | a4 | -.078 | .053 | -1.472 | .141 | -.183 | .026 |
| **Private PEB** | **~** | **Climate hope** | **a5** | **.155** | **.056** | **2.765** | **.006** | **.045** | **.264** |
| Activist PEB | ~ | Climate anxiety | a6 | .035 | .067 | 0.523 | .601 | -.096 | .166 |
| Activist PEB | ~ | Climate anger | a7 | .102 | .062 | 1.642 | .101 | -.020 | .225 |
| **Activist PEB** | **~** | **Climate sorrow** | **a8** | **.185** | **.072** | **2.575** | **.010** | **.044** | **.326** |
| **Activist PEB** | **~** | **Climate guilt** | **a9** | **.187** | **.057** | **3.276** | **.001** | **.075** | **.298** |
| Activist PEB | ~ | Climate hope | a10 | .083 | .055 | 1.495 | .135 | -.026 | .192 |
| **Emotional well-being** | **~** | **Climate anxiety** | **c1** | **-.214** | **.074** | **-2.898** | **.004** | **-.359** | **-.069** |
| Emotional well-being | ~ | Climate anger | c2 | -.093 | .067 | -1.378 | .168 | -.224 | .039 |
| Emotional well-being | ~ | Climate sorrow | c3 | -.100 | .078 | -1.291 | .197 | -.252 | .052 |
| Emotional well-being | ~ | Climate guilt | c4 | .004 | .060 | 0.063 | .950 | -.114 | .122 |
| **Emotional well-being** | **~** | **Climate hope** | **c5** | **.210** | **.059** | **3.571** | **.000** | **.095** | **.326** |
| **Social well-being** | **~** | **Climate anxiety** | **c6** | **-.143** | **.063** | **-2.264** | **.024** | **-.266** | **-.019** |
| Social well-being | ~ | Climate anger | c7 | -.103 | .061 | -1.697 | .090 | -.223 | .016 |
| Social well-being | ~ | Climate sorrow | c8 | -.120 | .070 | -1.711 | .087 | -.257 | .017 |
| **Social well-being** | **~** | **Climate guilt** | **c9** | **.108** | **.054** | **1.996** | **.046** | **.002** | **.214** |
| **Social well-being** | **~** | **Climate hope** | **c10** | **.310** | **.052** | **5.983** | **.000** | **.209** | **.412** |
| **Psychological well-being** | **~** | **Climate anxiety** | **c11** | **-.151** | **.070** | **-2.172** | **.030** | **-.287** | **-.015** |
| Psychological well-being | ~ | Climate anger | c12 | -.087 | .067 | -1.289 | .198 | -.219 | .045 |
| Psychological well-being | ~ | Climate sorrow | c13 | -.076 | .077 | -0.999 | .318 | -.226 | .074 |
| Psychological well-being | ~ | Climate guilt | c14 | .006 | .055 | 0.108 | .914 | -.102 | .114 |
| **Psychological well-being** | **~** | **Climate hope** | **c15** | **.188** | **.060** | **3.162** | **.002** | **.072** | **.305** |
| **Private PEB** | **~~** | **Activist PEB** |  | **.182** | **.042** | **4.383** | **.000** | **.101** | **.264** |
| **Climate anxiety** | **~~** | **Climate anger** |  | **.623** | **.032** | **19.183** | **.000** | **.560** | **.687** |
| **Climate anxiety** | **~~** | **Climate sorrow** |  | **.757** | **.022** | **33.714** | **.000** | **.713** | **.801** |
| **Climate anxiety** | **~~** | **Climate guilt** |  | **.543** | **.033** | **16.215** | **.000** | **.477** | **.609** |
| **Climate anxiety** | **~~** | **Climate hope** |  | **.520** | **.036** | **14.466** | **.000** | **.450** | **.591** |
| **Climate anger** | **~~** | **Climate sorrow** |  | **.682** | **.028** | **24.764** | **.000** | **.628** | **.736** |
| **Climate anger** | **~~** | **Climate guilt** |  | **.466** | **.036** | **12.950** | **.000** | **.396** | **.537** |
| **Climate anger** | **~~** | **Climate hope** |  | **.593** | **.031** | **19.093** | **.000** | **.532** | **.654** |
| **Climate sorrow** | **~~** | **Climate guilt** |  | **.460** | **.036** | **12.908** | **.000** | **.390** | **.530** |
| **Climate sorrow** | **~~** | **Climate hope** |  | **.570** | **.032** | **18.068** | **.000** | **.508** | **.632** |
| **Climate guilt** | **~~** | **Climate hope** |  | **.471** | **.036** | **12.918** | **.000** | **.400** | **.543** |
| **Private PEB** | **~~** | **Private PEB** |  | **.689** | **.036** | **19.034** | **.000** | **.618** | **.760** |
| **Activist PEB** | **~~** | **Activist PEB** |  | **.775** | **.031** | **24.803** | **.000** | **.714** | **.836** |
| **Emotional well-being** | **~~** | **Emotional well-being** |  | **.906** | **.023** | **39.354** | **.000** | **.861** | **.951** |
| **Social well-being** | **~~** | **Social well-being** |  | **.833** | **.032** | **25.990** | **.000** | **.770** | **.895** |
| **Psychological well-being** | **~~** | **Psychological well-being** |  | **.889** | **.026** | **34.116** | **.000** | **.838** | **.940** |
| **Climate anxiety** | **~~** | **Climate anxiety** |  | **.968** | **.015** | **63.091** | **.000** | **.938** | **.998** |
| **Climate anger** | **~~** | **Climate anger** |  | **.978** | **.013** | **75.658** | **.000** | **.953** | **1.004** |
| **Climate sorrow** | **~~** | **Climate sorrow** |  | **.946** | **.020** | **47.648** | **.000** | **.907** | **.985** |
| **Climate guilt** | **~~** | **Climate guilt** |  | **.973** | **.014** | **71.137** | **.000** | **.946** | **1.000** |
| **Climate hope** | **~~** | **Climate hope** |  | **.968** | **.015** | **63.765** | **.000** | **.938** | **.997** |
| **Emotional well-being** | **~~** | **Social well-being** |  | **.642** | **.027** | **23.793** | **.000** | **.589** | **.695** |
| **Emotional well-being** | **~~** | **Psychological well-being** |  | **.740** | **.026** | **28.644** | **.000** | **.689** | **.791** |
| **Social well-being** | **~~** | **Psychological well-being** |  | **.664** | **.029** | **22.744** | **.000** | **.607** | **.721** |
| **Gender** | **~~** | **Gender** |  | **1.000** | **.000** |  |  | **1.000** | **1.000** |
| **Gender** | **~~** | **Age** |  | **-.105** | **.044** | **-2.368** | **.018** | **-.191** | **-.018** |
| **Age** | **~~** | **Age** |  | **1.000** | **.000** |  |  | **1.000** | **1.000** |

# References

Czech Statistical Office. (n.d.). Veřejná database [Public database]. Retrieved June 4, 2026, from <https://vdb.czso.cz/vdbvo2/faces/cs/index.jsf?page=statistiky&katalog=33475>

Schmitt, M. T., Mackay, C. M. L., Droogendyk, L. M., & Payne, D. (2019). What predicts environmental activism? The roles of identification with nature and politicized environmental identity. *Journal of Environmental Psychology*, *61*, 20–29. https://doi.org/10.1016/j.jenvp.2018.11.003

Stanley, S. K., Hogg, T. L., Leviston, Z., & Walker, I. (2021). From anger to action: Differential impacts of eco-anxiety, eco-depression, and eco-anger on climate action and wellbeing. *The Journal of Climate Change and Health*, *1*, 100003. https://doi.org/10.1016/j.joclim.2021.100003

Żemojtel‐Piotrowska, M., Piotrowski, J. P., Osin, E. N., Cieciuch, J., Adams, B. G., Ardi, R., Bălţătescu, S., Bogomaz, S., Bhomi, A. L., Clinton, A., De Clunie, G. T., Czarna, A. Z., Esteves, C., Gouveia, V., Halik, M. H. J., Hosseini, A., Khachatryan, N., Kamble, S. V., Kawula, A., … Maltby, J. (2018). The mental health continuum‐short form: The structure and application for cross‐cultural studies–A 38 nation study. *Journal of Clinical Psychology*, *74*(6), 1034–1052. https://doi.org/10.1002/jclp.22570
